# Supplementary material
Source: publisher site journal article supplement (https://www.dovepress.com/article/456272)
Supplement: Supplementary file 1 [file get_supplementary_file.php]

**Supplementary Table 1** Survey questionnaire

Estimated time for responding: 15 minutes

| **#** | **Question** | **Response** |
| --- | --- | --- |
| E1 | EuroQol 5 dimensions 5-level (EQ-5D-5L) questionnaire assessing 5 dimensions: “mobility,” “self-care,” “usual activities,” “pain/discomfort,” and “anxiety/depression.” 20,21 | (Single answer per segment/list) |
| E2 | EuroQol 5 dimensions 5-level (EQ-5D-5L) questionnaire with a visual analog scale (EQ-VAS) to rate the health from 0 “the worst” to 100 “best imaginable health”20,21 |  |
|  | **From here, we would like to ask you about your conditions over the last two weeks.** | |
| S1 | Over the last 2 weeks, how often have you been bothered by the problems listed in GAD-7 questionnaire17,18 | (Single answer) |
| S2 | If you checked off any problems, how difficult have these problems made it for you to do your work, take care of things at home, or get along with other people17,18 | (Single answer) |
| Q1 | To answer questions from here, please think about your experiences in the past 6 months.  In the past 6 months, would you say that you had more days feeling excessive anxiety or worries than the days you did not feel that way about your work, school or other activities? | (Single answer)   1. No 2. Yes |
| Q2 | Do you have difficulty in controlling your worries? | (Single answer)   1. No 2. Yes |
| Q3 | In the past 6 months, when you were experiencing anxiety or feeling worried, did you have more days with the symptoms stated in DSM-5 questionnaire than the days you did not?2 (Single answer per line) | (Single answer) |
| Q4 | Have you ever experienced extreme pain/trouble/difficulty in important occasions related to your social life, work or other situations due to anxiety or worries that you were feeling? | (Single answer)   1. No 2. Yes |
|  | **To answer questions from here, please focus on the past two weeks in your life.** | |
| Q5 | In a previous question, you did indicate that you were troubled with the following things over the last two weeks.  Would you attribute those problems to a disease?  Or, would you say that it stems from your own personality/character?  Please tell us your thoughts on this.  < Problems/issues you responded about earlier >  Feeling nervous, anxious or on edge  Not being able to stop or control worrying  Worrying too much about different things  Having trouble relaxing  Being so restless that it is hard to sit still  Becoming easily annoyed or irritable  Feeling afraid as if something awful might happen | (Single answer)  1 I think it is a disease.  2 I think it is my personality.  3 Neither.  4 Not sure. |
| Q6 | Have you visited a medical institution for the conditions you said you felt troubled with in a previous question?  Please choose from below.  < Problems/issues you responded about earlier >  Feeling nervous, anxious or on edge Not being able to stop or control worrying Worrying too much about different things Having trouble relaxing Being so restless that it is hard to sit still Becoming easily annoyed or irritable Feeling afraid as if something awful might happen | (Single answer)  1 Yes, and I am going to an institution currently.  2 Yes, I have before, but not now.  3 No, I have never done that. |
| Q7 | This is a question for those of you who have visited a medical institution for the conditions you said you felt troubled with in a previous question. What clinical specialty/specialties did you go to?  < Problems/issues you responded about earlier >  Feeling nervous, anxious or on edge  Not being able to stop or control worrying  Worrying too much about different things  Having trouble relaxing  Being so restless that it is hard to sit still  Becoming easily annoyed or irritable  Feeling afraid as if something awful might happen | (Multiple answers)  1 Psychiatry  2 Psychosomatic medicine  3 Internal medicine  4 Others  5 Don't remember |
| Q7 sq1 | This is a question for those of you who have visited a medical institution for the conditions you said you felt troubled with in a previous question. About how long ago did you go for the first time?  < Problems/issues you responded about earlier >  Feeling nervous, anxious or on edge  Not being able to stop or control worrying  Worrying too much about different things  Having trouble relaxing  Being so restless that it is hard to sit still  Becoming easily annoyed or irritable  Feeling afraid as if something awful might happen | (Multiple answers)   |  | | | My first visit was less than 1 month ago | My first visit was over 1 month ago, but within 3 months from now | My first visit was over 3 months ago, but within 6 months from now | My first visit was over 6 months ago, but within 1 year from now | My first visit was over 1 year ago | Don't remember | | --- | --- | --- | --- | --- | --- | --- | --- | --- | | 1 | Psychiatry |  | 1 | 2 | 3 | 4 | 5 | 6 | | 2 | Psychosomatic medicine |  | 1 | 2 | 3 | 4 | 5 | 6 | | 3 | Internal medicine |  | 1 | 2 | 3 | 4 | 5 | 6 | | 4 | Others |  | 1 | 2 | 3 | 4 | 5 | 6 | |
| Q7 sq2 | This is a question for those of you who have visited a medical institution for the conditions you said you felt troubled with in a previous question. About how long ago was your last visit?  < Problems/issues you responded about earlier >  Feeling nervous, anxious or on edge  Not being able to stop or control worrying  Worrying too much about different things  Having trouble relaxing  Being so restless that it is hard to sit still  Becoming easily annoyed or irritable  Feeling afraid as if something awful might happen | (Multiple answers; as many as applicable)   |  | | | My last visit was less than 1 month ago | My last visit was over 1 month ago, but within 3 months from now | My last visit was over 3 months ago, but within 6 months from now | My last visit was over 6 months ago, but within 1 year from now | My last visit was over 1 year ago | Don't remember | | --- | --- | --- | --- | --- | --- | --- | --- | --- | | 1 | Psychiatry |  | 1 | 2 | 3 | 4 | 5 | 6 | | 2 | Psychosomatic medicine |  | 1 | 2 | 3 | 4 | 5 | 6 | | 3 | Internal medicine |  | 1 | 2 | 3 | 4 | 5 | 6 | | 4 | Others |  | 1 | 2 | 3 | 4 | 5 | 6 | |
| Q8 | This is a question for those of you who have visited a medical institution for the conditions you said you felt troubled with in a previous question. What prompted you to visit a medical institution for that?  < Problems/issues you responded about earlier >  Feeling nervous, anxious or on edge  Not being able to stop or control worrying  Worrying too much about different things  Having trouble relaxing  Being so restless that it is hard to sit still  Becoming easily annoyed or irritable  Feeling afraid as if something awful might happen | (Multiple answers)  1 Because my symptoms were severe.  2 Because my symptoms were giving me difficulty in daily activities.  3 Because I discovered through the internet etc. that it might be a disease.  4 Because I was recommended to go by friends/family members etc.  5 Due to results of my health check-up.  6 Others (Input of open-ended responses should be made optional)  7 Don't remember. |
| Q9 | Have you heard of the name of a disease called "Generalized Anxiety Disorder (GAD)"?  Please choose from below.  *Please choose "Yes" if you have heard either "Generalized Anxiety Disorder" or just "GAD." | (Single answer)   1. Yes, I have. 2. No, I have not. |
| Q10 | This is a question for those of you who have heard the name of the disease "Generalized Anxiety Disorder, or GAD."  How much do you think you know about this disease? | (Single answer)  Please choose from below.  1 I know details about the characteristics of the disease and treatment.  2 I have a rough idea about what kind of a disease it is.  3 I have only heard about the name. |
| Q10 sq1 | This is a question for those of you who have heard the name of "Generalized Anxiety Disorder, or GAD."  From where did you obtain information about "Generalized Anxiety Disorder or GAD"? | (Multiple answers)  Please choose from below.  1 I researched about it myself.  2 I heard about it from a healthcare professional.  3 I heard about it from family members and/or friends.  4 I just heard its name by chance.  5 Others  6 Don't remember. |
| Q11 | Would you be inclined to receive treatment for the problem you indicated in the previous question, if there was a treatment for it? Please choose one from below that fits your preference.  < Problems/issues you responded about earlier >  Feeling nervous, anxious or on edge  Not being able to stop or control worrying  Worrying too much about different things  Having trouble relaxing  Being so restless that it is hard to sit still  Becoming easily annoyed or irritable  Feeling afraid as if something awful might happen | (Single answer)  1 Yes, I'd like to get treatment.  2 No, not necessary. |
| Q12 | Please choose from the list below all the diseases that you have been diagnosed with in the past. | (Multiple answers)  1 Depression  2 Bipolar disorder  3 Panic disorder  4 Social anxiety disorder  5 Separation anxiety disorder  6 Generalized anxiety disorder  7 Obsessive-compulsive disorder  8 Body dysmorphic disorder  9 Post-traumatic stress disorder (PTSD)  10 Somatic symptom disorder, pain disorder  11 Illness anxiety disorder, hypochondria  12 Anorexia nervosa  13 Schizophrenia, delusional disorder  14 None in particular |
| Q13 | Please kindly choose from below the status that matches your condition of the listed disease(s). | (Single answer per line)   |  | | | | I am suspected to have this, but not diagnosed with it or treated (i.e. not seeing drs) | I received treatment before, but not now. (No medication prescribed) | I received treatment before, but not now. (Medication prescribed) | Now receiving treatment, with no medication prescribed | Now receiving treatment, with medication prescribed | | --- | --- | --- | --- | --- | --- | --- | --- | --- | | 1 | Depression |  |  | 1 | 2 | 3 | 4 | 5 | | 2 | Bipolar disorder |  |  | 1 | 2 | 3 | 4 | 5 | | 3 | Panic disorder |  |  | 1 | 2 | 3 | 4 | 5 | | 4 | Social anxiety disorder |  |  | 1 | 2 | 3 | 4 | 5 | | 5 | Separation anxiety disorder |  |  | 1 | 2 | 3 | 4 | 5 | | 6 | Generalized anxiety disorder |  |  | 1 | 2 | 3 | 4 | 5 | | 7 | Obsessive-compulsive disorder |  |  | 1 | 2 | 3 | 4 | 5 | | 8 | Body dysmorphic disorder |  |  | 1 | 2 | 3 | 4 | 5 | | 9 | Post-traumatic stress disorder (PTSD) |  |  | 1 | 2 | 3 | 4 | 5 | | 10 | Somatic symptom disorder, pain disorder |  |  | 1 | 2 | 3 | 4 | 5 | | 11 | Illness anxiety disorder, hypochondria |  |  | 1 | 2 | 3 | 4 | 5 | | 12 | Anorexia nervosa |  |  | 1 | 2 | 3 | 4 | 5 | | 13 | Schizophrenia, delusional disorder |  |  | 1 | 2 | 3 | 4 | 5 | |
| Q13 sq1 | How long ago was it that you were diagnosed with the listed disease(s)? | (Single answer per line)   |  | | | | Was diagnosed less than 1 year ago | Longer than 1 year ago, but less than 3 years | Longer than 3 years ago, but less than 5 years | Longer than 5 years ago, but less than 10 years | Was diagnosed 10 years or more ago | Don't remember | | --- | --- | --- | --- | --- | --- | --- | --- | --- | --- | | 1 | Depression |  |  | 1 | 2 | 3 | 4 | 5 | 6 | | 2 | Bipolar disorder |  |  | 1 | 2 | 3 | 4 | 5 | 6 | | 3 | Panic disorder |  |  | 1 | 2 | 3 | 4 | 5 | 6 | | 4 | Social anxiety disorder |  |  | 1 | 2 | 3 | 4 | 5 | 6 | | 5 | Separation anxiety disorder |  |  | 1 | 2 | 3 | 4 | 5 | 6 | | 6 | Generalized anxiety disorder |  |  | 1 | 2 | 3 | 4 | 5 | 6 | | 7 | Obsessive-compulsive disorder |  |  | 1 | 2 | 3 | 4 | 5 | 6 | | 8 | Body dysmorphic disorder |  |  | 1 | 2 | 3 | 4 | 5 | 6 | | 9 | Post-traumatic stress disorder (PTSD) |  |  | 1 | 2 | 3 | 4 | 5 | 6 | | 10 | Somatic symptom disorder, pain disorder |  |  | 1 | 2 | 3 | 4 | 5 | 6 | | 11 | Illness anxiety disorder, hypochondria |  |  | 1 | 2 | 3 | 4 | 5 | 6 | | 12 | Anorexia nervosa |  |  | 1 | 2 | 3 | 4 | 5 | 6 | | 13 | Schizophrenia, delusional disorder |  |  | 1 | 2 | 3 | 4 | 5 | 6 | |
| Q14 | Is there anyone among your blood-relatives who has been diagnosed with the following disease(s)?  Please choose all diseases that may apply.  *Please think about all blood-relatives, not just those whom you live with. | (Multiple answers)  1 Depression  2 Bipolar disorder  3 Panic disorder  4 Social anxiety disorder  5 Separation anxiety disorder  6 Generalized anxiety disorder  7 Obsessive-compulsive disorder  8 Body dysmorphic disorder  9 Post-traumatic stress disorder (PTSD)  10 Somatic symptom disorder, pain disorder  11 Illness anxiety disorder, hypochondria  12 Anorexia nervosa  13 Schizophrenia, delusional disorder  14 Nothing here applies/Not sure |
|  | | |
| **#** | **Question** | **Response** |
| F1 | < Lastly, we have several questions regarding yourself. >  Who do you currently live with? Please choose all that may apply from below. | (Multiple answers)    1 Spouse  2 Parent(s), parent(s)-in-law  3 Sibling(s)  4 Son(s), daughter(s)  5 Grandparent(s)  6 Grandchild(ren)  7 Other relatives  8 Partner  9 Friend(s), acquaintance(s)  10 I live alone |
| F2 | Please choose one from below that would best describe your work status. | (Single answer)  1 Corporate employee, public servant  2 Part-timer, temporary worker, contract employee  3 Self-employed  4 Full time homemaker  5 Student (of prep school, vocational school, college, post-graduate program, etc.)  6 Not working, on pension  7 Others |
| F3 | Please choose from below that represents your academic background.  *Those still in school can assume you have completed that school. | (Single answer)  1 Junior high school  2 High school (including vocational high schools)  3 Vocational school  4 Junior college  5 College, university  6 Post-graduate or higher |
| F4 | | Allow us to ask you about your underlying disease(s). |  | | --- | --- | | Please choose all diseases/symptoms you have from below. | | | (Multiple answers)  1 None of them apply to me  < Cardio-vascular >  2 Hypertension  3 Angina  4 Arrhythmia  5 Myocardial infarction  6 Chronic heart failure  7 Anemia  8 Other cardiovascular diseases  < Endocrinological, metabolic >  9 Diabetes  10 Dyslipidemia (hyperlipidemia)  11 Gout, hyperuricemia  12 Obesity  13 Hyperthyroidism  14 Hypothyroidism  15 Other endocrinological, metabolic diseases  < Respiratory, ear-nose-throat, infections >  16 Asthma  17 COPD: chronic bronchitis, pulmonary emphysema  < Gastro-enterological >  18 Gastric, duodenal ulcer  19 Crohn's disease  20 Ulcerative colitis  21 Gastritis (acute, chronic)  22 Reflux esophagitis (GERD)  23 Irritable bowel syndrome (IBS)  24 Chronic constipation  25 Hepatitis C  26 Liver cirrhosis  27 Fatty liver  < Renal, urinary tract, gynecological >  28 Chronic renal disease (renal failure etc)  29 Cystitis, urethritis  30 Pollakiuria, incontinence  31 Benign prostate hypertrophy (BPH) for MEN only  32 Overactive bladder (OAB)  33 Uterine fibroid for WOMEN only  34 Endometriosis for WOMEN only  35 Dysmenorrhea for WOMEN only  36 Premenstrual syndrome (PMS) for WOMEN only  37 Infertility  38 Menopause  < Bone, joints >  39 Osteoporosis  40 Rheumatoid arthritis  41 Systemic lupus erythematosus (SLE)  42 Osteoarthritis  43 Shoulder periarthritis  44 Lower back pain  < Neuro-logical >  45 Stroke (cerebral infarction, cerebral hemorrhage), subarachnoidal hemorrhage  46 Migraine  47 Neuralgia  48 Parkinson's disease  49 Multiple sclerosis/Neuromyelitis optica  50 Other neurological diseases  < Skin >  51 Atopic dermatitis  52 Psoriasis  53 Athlete's foot (including nail ringworm)  54 Eczema, urticaria (hives)  55 Herpes zoster  56 Hyperhidrosis  57 Alopecia areata  < Tumors, cancers >  58 Breast cancer  59 Lung cancer  60 Stomach cancer  61 Colorectal cancer  62 Prostate cancer for MEN only  63 Ovarian cancer for WOMEN only  64 Renal cell carcinoma  65 Blood cancers (leukemia, malignant lymphoma, multiple myeloma)  66 Other cancers |

**Supplementary Table 2** Responses by the probable GAD patients on the awareness and medical consultation status

| **Survey question** | **n (%)** |
| --- | --- |
| **Status of visiting medical institutions (n=1530)** | |
| Ever visited a medical institution | 747 (48.8) |
| Currently visiting a medical institution | 422 (27.6) |
| Have visited before, but not now | 325 (21.2) |
| Have never visited a medical institution | 783 (51.2) |
| **Clinical specialties patients ever visited (n=747)a** | |
| Psychiatry | 288 (38.6) |
| Psychosomatic medicine | 409 (54.8) |
| Internal medicine | 135 (18.1) |
| Others | 91 (12.2) |
| Don’t remember | 14 (1.9) |
| **Reason for medical examination (n=747)a** | |
| Because my symptoms were severe | 404 (54.1) |
| Because my symptoms made daily life difficult | 393 (52.6) |
| Because I learned about it on the internet | 128 (17.1) |
| Because a friend or family member recommended it | 177 (23.7) |
| Due to the results of my health check-up | 52 (7.0) |
| Others | 33 (4.4) |
| Don’t remember | 33 (4.4) |
| **Disease awareness (n=1530)** | |
| I have acquired information of the disease | 360 (23.5) |
| I know details about the characteristics of the disease and treatment | 59 (3.9) |
| I have a rough idea about what kind of a disease it is | 180 (11.8) |
| I have only heard about the name | 121 (7.9) |
| No, I have not | 1170 (76.5) |
| **Main routes of information acquisition for the disease (n=360)a** | |
| Looked it up on my own | 148 (41.1) |
| Heard it from a medical professional | 86 (23.9) |
| Heard about it from family members and/or friends | 47 (13.1) |
| Happened to hear the name of the disease | 97 (26.9) |
| Others | 18 (5.0) |
| Don’t remember | 21 (5.8) |
| **Motivation to receive treatment (n=1530)** | |
| Yes, I’d like to get treatment | 940 (61.4) |
| No, not necessary | 590 (38.6) |
| **Problem is caused by illness or personality (n=1530)** | |
| I think it is a disease | 479 (31.3) |
| I think it is my personality | 709 (46.3) |
| Neither | 169 (11.0) |
| Not sure | 173 (11.3) |

**a**Multiple choice questions, the percentages will not add to 100

GAD, generalized anxiety disorder

**Supplementary Table 3** Family history of mental disorders with GAD-7 ≥10 (n=1530)

| **Family history of mental disorders among probable GAD patients** | **n (%)** |
| --- | --- |
| Depression | 279 (18.2) |
| Bipolar disorder | 34 (2.2) |
| Panic disorder | 72 (4.7) |
| Social anxiety disorder | 26 (1.7) |
| Separation anxiety disorder | 15 (1.0) |
| GAD | 22 (1.4) |
| Obsessive-compulsive disorder | 27 (1.8) |
| Body dysmorphic disorder | 8 (0.5) |
| Post-traumatic stress disorder | 30 (2.0) |
| Somatic symptom disorder, pain disorder | 15 (1.0) |
| Illness anxiety disorder, hypochondria | 22 (1.4) |
| Anorexia nervosa | 16 (1.0) |
| Schizophrenia, delusional disorder | 61 (4.0) |
| None of the above/unsure | 1109 (72.5) |

GAD, generalized anxiety disorder; GAD-7, generalized anxiety disorder 7-item

**Supplementary Table 4** Underlying diseases among overall study population stratified by GAD probable diagnosis

| **Underlying diseases** | **Total (N=20,009)** | **GAD-7 ≥10 (n=1530)** | **GAD-7 <10 (n=18,479)** |
| --- | --- | --- | --- |
| Circulation | 4659 (23.3) | 382 (25.0) | 4277 (23.1) |
| Endocrinology and Metabolism | 3464 (17.3) | 270 (17.6) | 3194 (17.3) |
| Respiratory, Otorhinolaryngology, and Infections | 819 (4.1) | 108 (7.1) | 711 (3.8) |
| Gastroenterology | 2039 (10.2) | 277 (18.1) | 1762 (9.5) |
| Nephrology, Urology, and Gynecology | 2158 (10.8) | 276 (18.0) | 1882 (10.2) |
| Bone and Joint | 2536 (12.7) | 219 (14.3) | 2317 (12.5) |
| Nerves | 1472 (7.4) | 239 (15.6) | 1233 (6.7) |
| Skin | 2410 (12.0) | 276 (18.0) | 2134 (11.5) |
| Tumors and Cancers | 513 (2.6) | 36 (2.4) | 477 (2.6) |
| None of the above | 9282 (46.4) | 607 (39.7) | 8675 (46.9) |

GAD, generalized anxiety disorder; GAD-7, generalized anxiety disorder 7-item
